# Supplementary material for: T2-High Endotype and Response to Biological Treatments in Patients with Bronchiectasis
Source: MDPI journal article supplement (doi:10.3390/biomedicines9070772), 2021-07-02
Supplement: s1 [file s1]

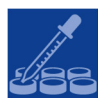

Online supplement for

# T2-High Endotype and Response to Biological Treatments in Patients with *Bronchiectasis*

Martina Oriano <sup>1,2</sup>, Andrea Gramegna <sup>1,2</sup>, Francesco Amati <sup>3,4</sup>, Alice D'Adda <sup>1</sup>, Michele Gaffuri <sup>5,6</sup>, Marco Contoli <sup>7</sup>, Francesco Bindo <sup>1,2</sup>, Edoardo Simonetta <sup>1,2</sup>, Carlotta Di Francesco <sup>1,2</sup>, Martina Santambrogio <sup>1</sup>, Giovanni Sotgiu <sup>8</sup>, Francesco Blasi <sup>1,2</sup> and Stefano Aliberti <sup>3,4,\*</sup>

- <sup>1</sup> IRCCS, Ca' Granda Ospedale Maggiore Policlinico, Respiratory Unit and Cystic Fibrosis Adult Center, 20122 Milan, Italy; martina.orianano@unimi.it (M.O.); andrea.gramegna@unimi.it (A.G.); alice.dadda@policlinico.mi.it (A.D.); francesco.bindo@unimi.it (F.B.); edoardo.simonetta@unimi.it (E.S.); carlotta.difrancesco@unimi.it (C.D.F.); msantambrogio@gmail.com (M.S.); francesco.blasi@unimi.it (F.B.)
- <sup>2</sup> Department of Pathophysiology and Transplantation, Università degli Studi di Milano, 20122 Milan, Italy
- <sup>3</sup> Department of Biomedical Sciences, Humanitas University, Pieve Emanuele, 20090 Milan, Italy; francesco.aamati@gmail.com
- <sup>4</sup> IRCCS, Humanitas Research Hospital, Respiratory Unit, Via Manzoni 56, Rozzano, 20089 Milan, Italy
- <sup>5</sup> Fondazione IRCCS, Ca' Granda Ospedale Maggiore Policlinico, Department of Otolaryngology and Head and Neck Surgery, 20122 Milan, Italy; michele.gaffuri@policlinico.mi.it
- <sup>6</sup> Department of Clinical Sciences and Community Health, University of Milan, 20122 Milan, Italy
- <sup>7</sup> Respiratory Unit, Department of Translational Medicine, University of Ferrara, 44121 Ferrara, Italy; ctm@unife.it
- <sup>8</sup> Clinical Epidemiology and Medical Statistics Unit, Department of Medical, Surgical and Experimental Sciences, University of Sassari, 07100 Sassari, Italy; gsotgiu@uniss.it
- \* Correspondence: stefano.aliberti@hunimed.eu

**Table S1.** Clinical characteristics of the cohort and of the cohort without patients with concomitant asthma.

| Variable                                           | Total Population ( <i>n</i> = 249) | Pure Bronchiectasis Without Asthma ( <i>n</i> = 203) |
|----------------------------------------------------|------------------------------------|------------------------------------------------------|
| <b>Demographics</b>                                |                                    |                                                      |
| Sex (female), <i>n</i> (%)                         | 193 (77.5%)                        | 160 (78.8%)                                          |
| Age, median (IQR) years                            | 63.0 (50.0, 71.0)                  | 63.0 (51.0, 71.0)                                    |
| Former/active smoker, <i>n</i> (%)                 | 109 (43.8%)                        | 91 (44.8%)                                           |
| Body mass index [Kg/m <sup>2</sup> ], median (IQR) | 21.2 (19.2, 24.0)                  | 21.2 (19.0, 24.0)                                    |
| <b>Radiology</b>                                   |                                    |                                                      |
| Reiff score, median (IQR)                          | 4.0 (3.0, 6.0)                     | 4.0 (3.0, 6.0)                                       |
| <b>Disease severity</b>                            |                                    |                                                      |
| BSI, median (IQR)                                  | 5.0 (3.0, 8.0)                     | 5.0 (3.0, 9.0)                                       |
| BSI risk class, <i>n</i> (%)                       | Mild                               | 87 (36.1%)                                           |
|                                                    | Moderate                           | 72 (36.7%)                                           |
|                                                    | Severe                             | 73 (37.2%)                                           |
| <b>Etiology</b>                                    |                                    |                                                      |
| Idiopathic, <i>n</i> (%)                           | 156 (62.7%)                        | 125 (61.6%)                                          |
| Primary immunodeficiency, <i>n</i> (%)             | 23 (9.2%)                          | 19 (9.4%)                                            |
| Post Infective, <i>n</i> (%)                       | 22 (8.8%)                          | 19 (9.4%)                                            |
| Primary Ciliary Dyskinesia, <i>n</i> (%)           | 10 (4.0%)                          | 9 (4.4%)                                             |
| Secondary Immunodeficiency, <i>n</i> (%)           | 10 (4.0%)                          | 9 (4.4%)                                             |
| ABPA, <i>n</i> (%)                                 | 3 (1.2%)                           | 2 (1.0%)                                             |

|                                                        |                     |                     |
|--------------------------------------------------------|---------------------|---------------------|
| Other* , n (%)                                         | 27 (10.8%)          | 20 (9.8%)           |
| <b>Comorbidities</b>                                   |                     |                     |
| BACI, median (IQR)                                     | 0.0 (0.0, 3.0)      | 0.0 (0.0, 0.0)      |
| Gastroesophageal reflux disease, n (%)                 | 127 (51.0%)         | 102 (50.2%)         |
| Cardiovascular diseases, n (%)                         | 88 (35.3%)          | 75 (36.9%)          |
| Rinosinusitis, n (%)                                   | 92 (36.9%)          | 65 (32.0%)          |
| Osteoporosis, n (%)                                    | 44 (17.7%)          | 38 (18.7%)          |
| Neoplastic disease, n (%)                              | 33 (13.3%)          | 31 (15.3%)          |
| Depression, n (%)                                      | 23 (9.2%)           | 19 (9.4%)           |
| <b>Clinical status</b>                                 |                     |                     |
| Exacerbations previous year, median (IQR)              | 1.0 (0.0, 2.0)      | 1.0 (0.0, 2.0)      |
| 3+ exacerbations in the previous year, n (%)           | 37 (16.2%)          | 27 (14.4%)          |
| >1 hospitalization in previous year, n (%)             | 23 (10.1%)          | 17 (9.0%)           |
| mMRC, n (%)                                            | 0                   | 122 (60.4%)         |
|                                                        | 1                   | 59 (29.2%)          |
|                                                        | 2                   | 10 (5.0%)           |
|                                                        | 3                   | 7 (3.5%)            |
|                                                        | 4                   | 4 (2.0%)            |
|                                                        | 3-4                 | 11 (5.4%)           |
| <b>Quality of life - QoL-B questionnaire</b>           |                     |                     |
| QoL-B questionnaire Physical, median (IQR)             | 66.7 (40.0, 80.0)   | 66.7 (40.0, 86.7)   |
| QoL-B questionnaire Role, median (IQR)                 | 66.7 (46.7, 86.7)   | 70.0 (53.3, 86.7)   |
| QoL-B questionnaire Vitality, median (IQR)             | 55.6 (44.4, 66.7)   | 55.6 (44.4, 66.7)   |
| QoL-B questionnaire Emotion, median (IQR)              | 75.0 (55.6, 91.7)   | 79.2 (58.3, 91.7)   |
| QoL-B questionnaire Social, median (IQR)               | 75.0 (47.2, 83.3)   | 75.0 (50.0, 91.7)   |
| QoL-B questionnaire Treatment Burden, median (IQR)     | 66.7 (55.6, 77.8)   | 66.7 (55.6, 77.8)   |
| QoL-B questionnaire Health, median (IQR)               | 41.7 (25.0, 58.3)   | 41.7 (25.0, 58.3)   |
| QoL-B questionnaire Respiration, median (IQR)          | 74.1 (59.3, 81.5)   | 74.1 (63.0, 85.2)   |
| <b>Functional evaluation</b>                           |                     |                     |
| FEV <sub>1</sub> , median (IQR) %predict.              | 84.0 (70.8, 98.2)   | 84.0 (71.0, 99.2)   |
| FEV <sub>1</sub> <50%predict. , median (IQR)           | 16 (6.7%)           | 13 (6.6%)           |
| FEV <sub>1</sub> <35%predict. , median (IQR)           | 6 (2.5%)            | 6 (3.1%)            |
| <b>Microbiology</b>                                    |                     |                     |
| Chronic infection, n (%)                               | 83 (40.3%)          | 74 (43.3%)          |
| Chronic infection <i>P. aeruginosa</i> , n (%)         | 45 (21.8%)          | 41 (24.0%)          |
| Chronic Infection <i>H. Influenzae</i> , n (%)         | 16 (7.8%)           | 15 (8.8%)           |
| Chronic Infection MSSA, n (%)                          | 16 (7.8%)           | 14 (8.2%)           |
| Chronic Infection MRSA, n (%)                          | 4 (1.9%)            | 4 (2.3%)            |
| Chronic Infection <i>S. maltophilia</i> , n (%)        | 4 (1.9%)            | 3 (1.8%)            |
| Chronic Infection <i>Achromobacter</i> , n (%)         | 2 (1.0%)            | 2 (1.2%)            |
| Chronic Infection <i>S. pneumoniae</i> , n (%)         | 1 (0.5%)            | 1 (0.6%)            |
| Chronic Infection <i>A. fumigatus</i> , n (%)          | 2 (1.0%)            | 1 (0.6%)            |
| Other chronic infection, n (%)                         | 10 (4.9%)           | 7 (4.1%)            |
| <b>Th2 high endotype</b>                               |                     |                     |
| Blood eosinophils, median (IQR) cells·µL <sup>-1</sup> | 130.0 (80.0, 220.0) | 120.0 (80.0, 200.0) |
| Oral FeNO, median (IQR) ppb                            | 14.6 (8.5, 24.3)    | 14.6 (9.2, 21.9)    |

Definition of abbreviations: BSI= Bronchiectasis severity index; MRSA= Methicillin-Resistant Staphylococcus Aureus; MSSA= Methicillin- sensitive Staphylococcus Aureus; ABPA= Allergic bronchopulmonary aspergillosis. Data are presented as median (interquartile range) or n (%). \* Connective Tissue Disease, Alpha1-antitrypsin deficiency, Rheumatoid arthritis, Ulcerative colitis, Aspiration, Asthma, COPD, Inflammatory bowel disease, NTM infection.

**Table S2.** Comparison of clinical characteristics of Th2 and non-Th2 high.

| Variable                                                   | Th2 High<br>Endotype (n = 88) | Non-Th2 High (n<br>= 161) | p-Value |
|------------------------------------------------------------|-------------------------------|---------------------------|---------|
| <b>Demographics</b>                                        |                               |                           |         |
| Sex (female), n (%)                                        | 61 (69.3%)                    | 132 (82.0%)               | 0.022   |
| Age, median (IQR) years                                    | 65.0 (54.8, 70.2)             | 62.0 (48.0, 71.0)         | 0.166   |
| Former/Active smoker, n (%)                                | 44 (50.0%)                    | 65 (40.4%)                | 0.143   |
| Body mass index [Kg/m <sup>2</sup> ], median (IQR) , n (%) | 21.4 (19.0, 23.8)             | 21.2 (19.2, 24.0)         | 0.920   |
| <b>Radiology</b>                                           |                               |                           |         |
| Reiff score, median (IQR)                                  | 4.0 (3.0, 6.0)                | 4.0 (2.0, 6.0)            | 0.116   |
| <b>Disease severity</b>                                    |                               |                           |         |
| BSI, median (IQR)                                          | 6.0 (4.0, 10.0)               | 5.0 (3.0, 8.0)            | 0.071   |
| <b>Etiology</b>                                            |                               |                           |         |
| Idiopathic, n (%)                                          | 57 (64.8%)                    | 99 (61.5%)                | 0.341   |
| Primary immunodeficiency, n (%)                            | 6 (6.8%)                      | 17 (10.6%)                |         |
| Post Infective, n (%)                                      | 4 (4.5%)                      | 18 (11.2%)                |         |
| Primary Ciliary Dyskinesia, n (%)                          | 2 (2.3%)                      | 8 (5.0%)                  |         |
| Secondary Immunodeficiency, n (%)                          | 5 (5.7%)                      | 5 (3.1%)                  |         |
| ABPA, n (%)                                                | 2 (2.3%)                      | 1 (0.6%)                  |         |
| Other* , n (%)                                             | 12 (13.6%)                    | 14 (8.8%)                 |         |
| <b>Comorbidities</b>                                       |                               |                           |         |
| BACI, median (IQR)                                         | 0.0 (0.0, 3.0)                | 0.0 (0.0, 0.0)            | 0.003   |
| Gastroesophageal reflux disease, n (%)                     | 47 (53.4%)                    | 80 (49.7%)                | 0.575   |
| Cardiovascular diseases, n (%)                             | 24 (41.4%)                    | 55 (34.2%)                | 0.598   |
| Rinosinusitis, n (%)                                       | 41 (46.6%)                    | 51 (31.7%)                | 0.020   |
| Osteoporosis, n (%)                                        | 18 (20.5%)                    | 26 (16.1%)                | 0.395   |
| Neoplastic disease, n (%)                                  | 12 (13.6%)                    | 21 (13.0%)                | 0.895   |
| Depression, n (%)                                          | 10 (11.4%)                    | 13 (8.1%)                 | 0.392   |
| <b>Clinical status</b>                                     |                               |                           |         |
| Exacerbations previous year, median (IQR)                  | 1.0 (0.0, 2.0)                | 1.0 (0.0, 2.0)            | 0.309   |
| 3 + exacerbations in the previous year, n (%)              | 17 (20.7%)                    | 20 (13.7%)                | 0.167   |
| > 1 hospitalization in the previous year, n (%)            | 11 (13.4%)                    | 12 (8.2%)                 | 0.211   |
| mMRC, n (%)                                                | 0                             | 104 (65.0%)               | 0.267   |
|                                                            | 1                             | 45 (28.1%)                |         |
|                                                            | 2                             | 6 (3.8%)                  |         |
|                                                            | 3                             | 3 (1.9%)                  |         |
|                                                            | 4                             | 2 (1.2%)                  |         |
|                                                            | 3-4                           | 5 (3.1%)                  | 0.086   |
| <b>Quality of life-QoL-B questionnaire</b>                 |                               |                           |         |
| QoL-B questionnaire Physical, median (IQR)                 | 63.4 (41.7, 80.0)             | 66.7 (40.0, 86.7)         | 0.455   |
| QoL-B questionnaire Role, median (IQR)                     | 66.7 (46.7, 86.7)             | 73.3 (51.6, 85.0)         | 0.726   |
| QoL-B questionnaire Vitality, median (IQR)                 | 55.6 (44.4, 77.8)             | 55.6 (33.3, 66.7)         | 0.279   |
| QoL-B questionnaire Emotion, median (IQR)                  | 79.2 (52.1, 100.0)            | 75.0 (57.0, 91.7)         | 0.726   |
| QoL-B questionnaire Social, median (IQR)                   | 58.3 (43.8, 83.3)             | 75.0 (50.0, 91.7)         | 0.199   |
| QoL-B questionnaire Treatment Burden, median (IQR)         | 66.7 (66.7, 77.8)             | 66.7 (55.6, 77.8)         | 0.128   |
| QoL-B questionnaire Health, median (IQR)                   | 41.7 (19.4, 58.3)             | 41.7 (25.0, 58.3)         | 0.386   |
| QoL-B questionnaire Respiration, median (IQR)              | 66.7 (54.9, 81.5)             | 77.8 (64.8, 85.2)         | 0.054   |
| <b>Functional evaluation</b>                               |                               |                           |         |
| FEV <sub>1</sub> , median (IQR) %predict.                  | 83.0 (66.0, 97.0)             | 86.0 (73.5, 100.5)        | 0.091   |
| FEV <sub>1</sub> <50%predict. , n (%)                      | 9 (11.1%)                     | 7 (4.4%)                  | 0.090   |

|                                                        |            |            |       |
|--------------------------------------------------------|------------|------------|-------|
| FEV <sub>1</sub> <35%predict. , <i>n</i> (%)           | 4 (5.0%)   | 2 (1.3%)   | 0.191 |
| <b>Microbiology</b>                                    |            |            |       |
| Chronic infection, <i>n</i> (%)                        | 26 (34.7%) | 57 (43.5%) | 0.213 |
| Chronic infection <i>P. aeruginosa</i> , <i>n</i> (%)  | 16 (21.3%) | 29 (22.1%) | 0.893 |
| Chronic Infection <i>H. Influenzae</i> , <i>n</i> (%)  | 3 (4.0%)   | 13 (10.0%) | 0.123 |
| Chronic Infection MSSA, <i>n</i> (%)                   | 4 (5.3%)   | 12 (9.2%)  | 0.323 |
| Chronic Infection MRSA, <i>n</i> (%)                   | 1 (1.3%)   | 3 (2.3%)   | 0.632 |
| Chronic Infection <i>S. maltophilia</i> , <i>n</i> (%) | 2 (2.7%)   | 2 (1.5%)   | 0.568 |
| Chronic Infection <i>Achromobacter</i> , <i>n</i> (%)  | 1 (1.3%)   | 1 (0.8%)   | 0.688 |
| Chronic Infection <i>S. pneumoniae</i> , <i>n</i> (%)  | 0 (0.0%)   | 1 (0.8%)   | 0.448 |
| Chronic Infection <i>A. fumigatus</i> , <i>n</i> (%)   | 2 (2.7%)   | 0 (0.0%)   | 0.06  |
| Other chronic infection, <i>n</i> (%)                  | 3 (4.0%)   | 7 (5.3%)   | 0.666 |

Definition of abbreviations: BSI= Bronchiectasis severity index; MRSA= Methicillin-Resistant Staphylococcus Aureus; MSSA= Methicillin- sensitive Staphylococcus Aureus; ABPA= Allergic bronchopulmonary aspergillosis. Data are presented as median (interquartile range) or *n* (%). \* Connective Tissue Disease, Alpha1-antitrypsin deficiency, Rheumatoid arthritis, Ulcerative colitis, Aspiration, Asthma, COPD, Inflammatory bowel disease, NTM infection.
